# Supplementary material for: Holliday junction affinity of the base excision repair factor Endo III contributes to cholera toxin phage integration
Source: PubMed Central journal article supplement — EMBO J. 2012 Aug 3;31(18):3757–67. doi: 10.1038/emboj.2012.219 (PMC3442271; doi:10.1038/emboj.2012.219), 2012-08-03
Supplement: emboj2012219s1.pdf [file emboj2012219s1.pdf]

## Supplementary Tables

**Table S1. Position of the mariner transposon insertion in *xerC* and *nth* genes.**

| Clone | Gene                   | Nucleotide position in the N16961 genome | Flanking DNA sequence |
|-------|------------------------|------------------------------------------|-----------------------|
| 1     | <i>xerC</i>            | 122149                                   | tacttTA-----          |
| 2     | <i>xerC</i>            | 122486                                   | gagcTA-----           |
| 3     | <i>xerC</i> (promotor) | 121393                                   | atcttTA-----          |
| 4     | <i>xerC</i>            | 122120                                   | aattaTA-----          |
| 5     | <i>xerC</i> (promotor) | 121988                                   | gacatTA               |
| 6     | <i>xerC</i>            | 122149                                   | gtactTA               |
| 7     | <i>nth</i>             | 1080611                                  | ccgcaTA-----          |
| 8     | <i>nth</i>             | 1080773                                  | acggcCA-----          |
| 9     | <i>nth</i>             | 1080523                                  | gttttTA-----          |
| 10    | <i>nth</i>             | 1080511                                  | tgctcTA-----          |
| 11    | <i>nth</i>             | 1080611                                  | ttgagTA-----          |

**Table S2. Strains**

| Strains | Genotype/Phenotypes                                                                       | References/ Resources             |
|---------|-------------------------------------------------------------------------------------------|-----------------------------------|
| N16961  | O1 El Tor strain, St <sup>r</sup>                                                         | (Heidelberg et al., Nature, 2000) |
| MV18    | N16961 <i>lacZ</i> (RS2 RS1 <i>dif1</i> :: <i>aadA1</i> ; Sp <sup>r</sup> St <sup>r</sup> | (Das et al., PNAS, 2010)          |
| MV78    | MV18 <i>lacZ<sub>Ec</sub>::dif1</i> ; St <sup>r</sup>                                     | (Das et al., PNAS, 2010)          |
| BJ51    | MV78 <i>fpg::arr2</i> ; Ery <sup>r</sup>                                                  | This study                        |
| BJ52    | MV78 <i>nth::Km<sup>r</sup></i>                                                           | This study                        |
| BJ53    | MV78 <i>fpg::arr2</i> , <i>nth::Km<sup>r</sup></i> ; Ery <sup>r</sup>                     | This study                        |
| BJ47    | MV78 <i>xthA::Km<sup>r</sup></i>                                                          | This study                        |
| BJ48    | MV78 <i>nfo</i>                                                                           | This study                        |
| BJ78    | MV78 <i>nfo</i> , <i>xthA::Km<sup>r</sup></i>                                             | This study                        |

**Table S3. Oligonucleotides used in this study. Nucleotides highlighted in bold correspond to the overlap of the different recombination sites.**

| Name      | Sequence                                                                                      |
|-----------|-----------------------------------------------------------------------------------------------|
| Diftop    | ATCAGTGCGCATTATGTATGTTATGTTAAATGGA                                                            |
| Difbot    | CTGTCCATTAAACATAACATACATAATGCGCACTGAT                                                         |
| AttPtop   | TACGCCCTTAGTGCGTATTATGTGGCGCGGCATTATGTTGAGGGTT<br>CCG                                         |
| AttPbot   | CTGCGGAACCCGTAACATAATGGCGTATAATACGCATTAAGGGCG<br>TA                                           |
| DiftopEXT | CAATCTAGACCGCCGCTTAGTGCGCATTATGTATGTTATGTTAAA<br>TTAAGGCATAATGTCGACAA                         |
| DifbotEXT | TTGTCGACATTATGCCTTAATTTAACATAACATACATAATGCGCAC<br>TAAGGCGGCGGTCTAGATTG                        |
| HJ-CTX1   | GATCCGTGATCACGCTGAACGCGTTTTAGCAGTGCGCATTATGTGG<br>CGCGGCATTATGTTGAGGGGCCTAACGCCTAAAGCGGCCGCTA |
| HJ-CTX2   | ATCGTAGGCGGCCGCTTAGGCGTTAGGCCCGTAACATAATGGC<br>GTATAATACGCATTCGACCGTTGCCGGATCCG               |
| HJ-CTX3   | CGATCGGATCCGGCAACGGTTCGAGTGCGTATTATGTATGTTATGTT<br>AAATGACATCCTGAGATCTCGA                     |
| HJ-X4     | TCGATCGAGATCTCAGGATGTCATTTAACATAACATACATAATGCG<br>CACTGCTAAAACGCGTTCAGCGTGATCACG              |
| HJ-CTX2   | ATCGTAGGCGGCCGCTTAGGCGTTAGGCCCGTAACATAATGGC                                                   |

|               |                                                                                          |
|---------------|------------------------------------------------------------------------------------------|
| suicide       | GTCTAATACGCATTTCGACCGTTGCCGGATCCG                                                        |
| HJ-X4 suicide | TCGATCGAGATCTCAGGATGTCATTTAACATAACATATCTAATGCG<br>CACTGCTAAAACGCGTTCAGCGTGATCACG         |
| HJ-DIF-1      | GATCCGTGATCACGCTGAACGCGTTTTAGCAGTGCGCATTATGTAT<br>GTTATGTTAAATGGCCTAACGCCTAAAGCGGCCGCCTA |
| HJ-DIF-2      | ATCGTAGGCGGCCGCTTTAGGCGTTAGGCCATTTAACATAACATAC<br>ATAATGCGCACTCGACCGTTGCCGGATCCG         |
| HJ-DIF-3      | CGATCGGATCCGGCAACGGTTCGAGTGCGCATTATGTATGTTATGTT<br>AAATGACATCCTGAGATCTCGA                |
| K120QTop      | GCCCCGGCGTTGGGCGTCAAACCGCTAATGTGGTG                                                      |
| K120QBot      | CACCACATTAGCGGTTTGACGCCCAACGCCGGGC                                                       |
| NSpe Top      | GCCCCGGCGTTGGGCGTAGCACCGCTAATGTGGTGTTG                                                   |
| NSpe Bot      | CAACACCACATTAGCGGTGCTACGCCCAACGCCGGGC                                                    |
| FORK-1        | CGCGGTACGGCCGGAAGCCTGCTTTTTTATACAAGCTTAACTCCC                                            |
| FORK-2        | GCGTCGGCTGCAGAGCGTATAAAGCAGGCTTCCGGCCGTACCGCG                                            |
| FORK-3        | GGGAGTTAAGCTTGTATAAA                                                                     |
| FORK-4        | ATACGCTCTGCAGCCGACGC                                                                     |
| ARB1          | GGCCACGCGTCGACTAGTACNNNNNNNNNNNGATAT                                                     |
| ARB2          | GGCCACGCGTCGACTAGTAC                                                                     |
| ARB6          | GGCCACGCGTCGACTAGTACNNNNNNNNNNNACGCC                                                     |
| 1314          | GTCATCGTCATCCTTGTAATCG                                                                   |
| 846           | AAATGATCACGAGATAGGGTTGAGTGTTG                                                            |

**Table S4. Plasmids**

| Name           | Description                                                                                                                                    | References/Resources                  |
|----------------|------------------------------------------------------------------------------------------------------------------------------------------------|---------------------------------------|
| pSW23T         | pSW23::oriTRP4; oriVR6K $\gamma$ ; Cm <sup>r</sup>                                                                                             | (Demarre et al., Res Microbiol, 2005) |
| pKAS32         | pGP704 derivative carrying the <i>rpsL</i> counter selectable marker; Ap <sup>r</sup>                                                          | (Skorupski and Taylor, Gene, 1996)    |
| pMEV30         | pSW23T harbouring the replication and integration machinery of RS1, a CTX satellite phage of <i>V. cholerae strain</i> N16961; Cm <sup>r</sup> | (Das et al., PNAS, 2010)              |
| pSW-Short- CTX | AttP <sup>ET</sup> cloned into pSW23T                                                                                                          | (Val et al., Mol Cell, 2005)          |
| pBJ13          | pSC101 derivative with <i>nth</i> <sup>Vc</sup> under P <sub>ara</sub> promoter                                                                | This study                            |
| pBJ14          | pSC101 derivative with <i>nth</i> <sup>Ec</sup> under P <sub>ara</sub> promoter                                                                | This study                            |
| pBJ16          | pKAS32 carrying an <i>Km</i> <sup>R</sup> cassette flanked by the upstream and downstream regions of <i>nth</i> ; Ap <sup>r</sup>              | This study                            |
| pBJ18          | pKAS32 carrying an <i>Km</i> <sup>R</sup> cassette flanked by the upstream and downstream regions of <i>xthA</i> ; Ap <sup>r</sup>             | This study                            |
| pBJ20          | pKAS32 carrying an <i>Ery</i> <sup>R</sup> cassette flanked by the upstream and downstream regions of <i>fpg</i> ; Ap <sup>r</sup>             | This study                            |
| pBJ41          | pSC101 derivative with <i>nei</i> <sup>Ec</sup> under P <sub>ara</sub> promoter                                                                | This study                            |

|       |                                                                                                                                                |                          |
|-------|------------------------------------------------------------------------------------------------------------------------------------------------|--------------------------|
| pBJ42 | pSC101 derivative with <i>nth</i> <sup>Vc</sup> ( <i>K120Q</i> ) under P <sub>ara</sub> promoter                                               | This study               |
| pBJ61 | pET28a vector with EndoIII Vcholerae gene cloned NcoI/XhoI                                                                                     | This study               |
| pBJ62 | pBJ61 with the K120Q mutation into EndoIII                                                                                                     | This study               |
| pBS22 | pSW23T harbouring the replication and integration machinery RS2 of the CTX classical phage of <i>V. cholerae</i> strains 569B; Cm <sup>r</sup> | (Das et al., PNAS, 2010) |

## References

- Das, B., Bischerour, J., Val, M.-E., and Barre, F.X. (2010). Molecular keys of the tropism of integration of the cholera toxin phage. *PNAS* *107*, 4377-4382.
- Demarre, G., Guerout, A.M., Matsumoto-Mashimo, C., Rowe-Magnus, D.A., Marliere, P., and Mazel, D. (2005). A new family of mobilizable suicide plasmids based on broad host range R388 plasmid (IncW) and RP4 plasmid (IncPalpha) conjugative machineries and their cognate Escherichia coli host strains. *Res Microbiol* *156*, 245-255.
- Heidelberg, J.F., Eisen, J.A., Nelson, W.C., Clayton, R.A., Gwinn, M.L., Dodson, R.J., Haft, D.H., Hickey, E.K., Peterson, J.D., Umayam, L., *et al.* (2000). DNA sequence of both chromosomes of the cholera pathogen *Vibrio cholerae*. *Nature* *406*, 477-483.
- Kepple KV, Boldt JL, Segall AM (2005) Holliday junction-binding peptides inhibit distinct junction-processing enzymes. *Proc Natl Acad Sci U S A* **102**(19): 6867-6872
- Skorupski, K., and Taylor, R.K. (1996). Positive selection vectors for allelic exchange. *Gene* *169*, 47-52.
- Thayer MM, Ahern H, Xing D, Cunningham RP, Tainer JA (1995) Novel DNA binding motifs in the DNA repair enzyme endonuclease III crystal structure. *EMBO J* **14**(16): 4108-4120
- Val, M.-E., Bouvier, M., Campos, J., Sherratt, D.J., Cornet, F., Mazel, D., and Barre, F.-X. (2005). The single stranded genome of phage CTX is the form used for integration into the genome of *Vibrio cholerae*. *Mol Cell* *19*, 559-566.

## Supplementary Figures

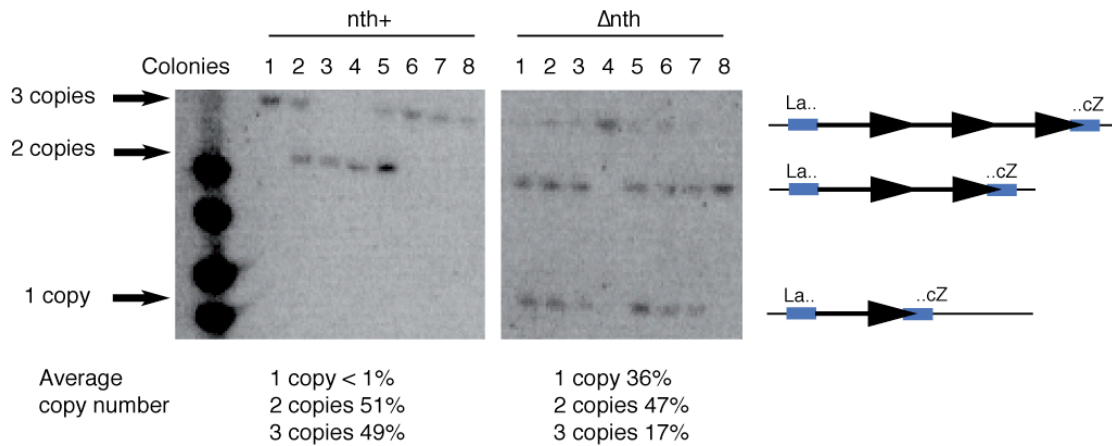

**Figure S1.** Detection of the number of integrated copies of RS1 found in N16961 reporter cells after lysogenic conversion. Briefly, 8 individual white colonies (lysogenic clones) from a WT or a *nth* genetic background were grown overnight. Genomic DNA was extracted and 5 $\mu$ g of DNA was digested by *Ava*I (10 units, New England Biolabs) for 5 hours. Restriction products were separated on a 0.8% agarose, 1X TAE gel. Southern Blot was performed using a radioactively labeled probe against the *lacZ* gene. The pMEV30 (containing RS1) is devoid of *Ava*I restriction sites. Genomic DNA digested by *Ava*I generates a 1580bp fragment encompassing the *LacZ::dif* cassette in the absence of lysogenic phage or DNA fragments of 6381bp, 11182bp and 15983bp when 1 copy, 2 copies and 3 copies of the phage are integrated, respectively. The signals corresponding to a single integrated copy in the 8 colonies that were analysed were added. The signals corresponding to double integrated copies in the 8 colonies that were analysed were added. The signals corresponding to triple integrated copies in the 8 colonies that were analysed were added. The fraction of the genomes containing 1, 2 and 3 copies were obtained by dividing these numbers by the total signal detected. Fractions are indicated at the bottom of the gels.

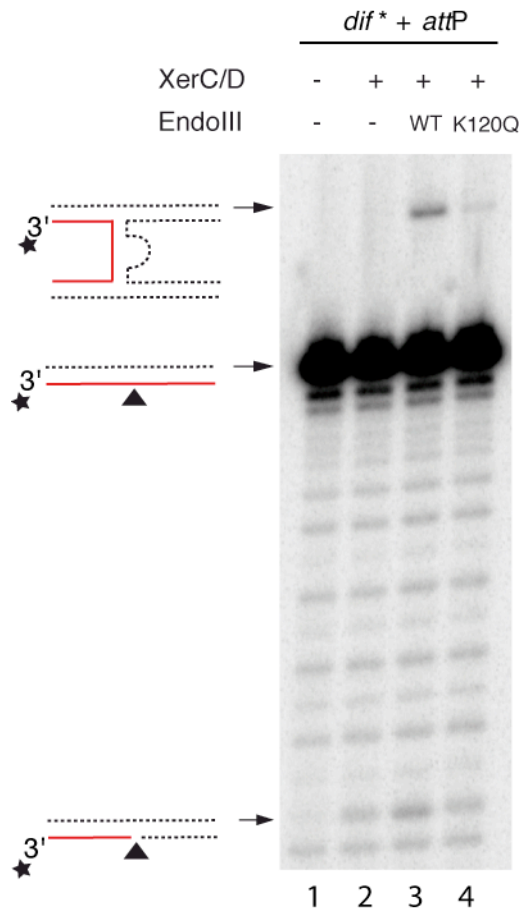

**Figure S2.** *Vibrio cholerae* EndoIII and the K120Q mutant stimulate recombination between *dif* and *attP* of RS2. 3' labelled *dif* and cold *attP* substrates were incubated with XerC and XerD recombinases with the wild type or the K120Q mutant *V.cholerae* EndoIII. Reactions were incubated for 4 hours at 37°C. Samples were ethanol precipitated and the different products were separated on a 10% acrylamide sequencing gel. Schemes of the *attP/dif* pseudo-HJ product generated by XerC catalysis and the cleaved intermediate are shown on the left of the gel. The 3' labeled strands is colored in red. *Vibrio cholerae* EndoIII sequence is 85% identical to the *E. coli* protein. The *Vibrio cholerae* protein stimulates efficiently the reaction (compare lane 2 and 3). The K120Q mutant is catalytically dead ( $k_{cat}$  10000 fold reduce (Thayer et al, 1995)) but it continues to stimulate the reaction (compare lane 2 and 4) demonstrating that the catalytic activity of EndoIII is not essential. Nevertheless, the K120Q mutation reduces the ability to stimulate the recombination suggesting that this residue is somehow critical for this novel activity of EndoIII.



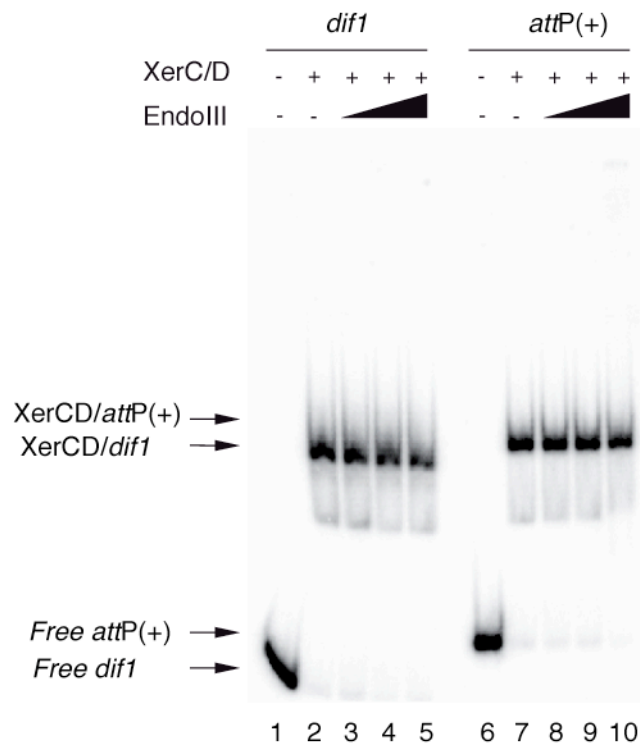

**Figure S4.** (A) EMSA of *dif1* in the presence of XerC, XerD and/or Endo III. (B) EMSA of *attP(+)* in the presence of XerC, XerD and/or Endo III. Experiments were performed as in Figure 5A.

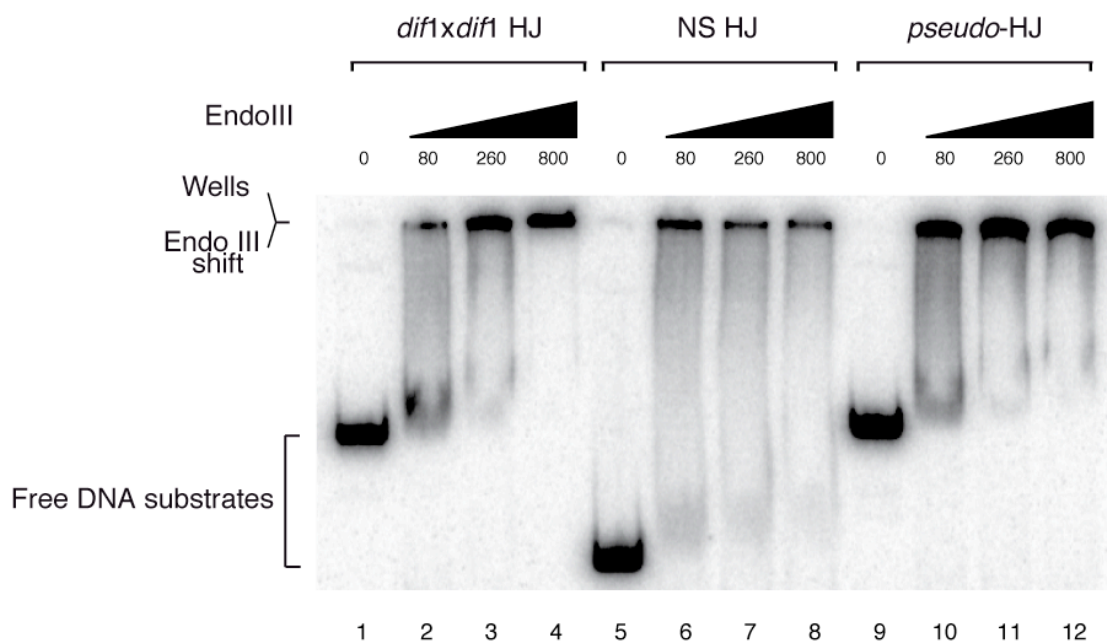

**Figure S5. Endo III binds to HJs independently of their sequence.**

EMSA of *dif1/dif1* HJs, non specific HJs (NS-HJ) and *attP(+)/dif1* pseudo-HJs in the presence of increasing concentrations of Endo III (0 lanes 1, 5 and 9, 80nM lanes 2, 6 and 10, 260nM lanes 3, 7 and 11 and 800nM lanes 4, 8 and 12). The sequences of the NS HJ are identical to those described by (Kepple et al, 2005). Samples were incubated 5 minutes at room temperatures before loading on a 5% acrylamide, 1X TBE gel and run at 4°C during 45 minutes. Gel was dried, exposed to phosphorscreen and analysed using Typhoon (GE Healthcare).



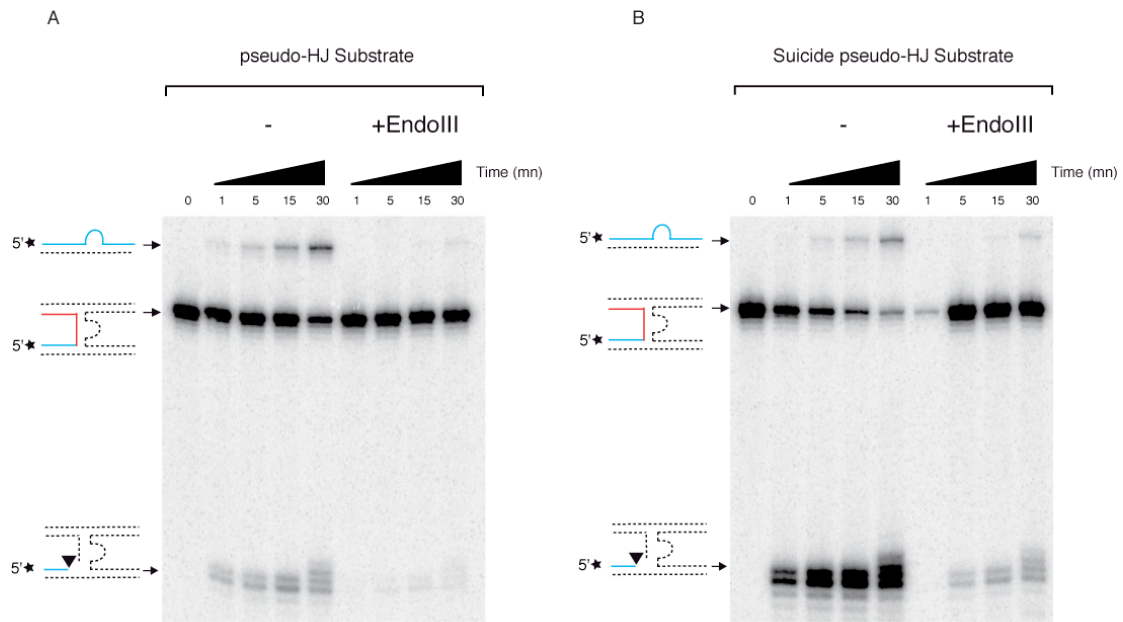

**Figure S6. EndoIII blocks XerC cleavage step of the pseudo-HJ resolution.** (A) Pseudo-HJ resolution assays were performed in the presence or the absence of EndoIII. Pseudo-HJ DNA substrates were radiolabelled at the 5' extremity of the HJ-III strand. Assay was performed with 10nM of the *attP(+)/dif1* pseudo-HJs, 100nM XerD and 150nM XerC in the reaction buffer containing 25mM Tris-HCl (pH 7.4), 100mM NaCl, 1mM EDTA, 0.1 $\mu$ g/mL BSA and 10% glycerol. When present, EndoIII was added at 200nM concentration immediately after XerC and XerD recombinases. Aliquots of the reaction were removed 1, 5, 15 and 30 minutes after the addition of the recombinases. The reaction was stopped by the addition of 0,1% SDS and proteinase K. Samples were treated and resolved on 10% acrylamide denaturing gel. Gel was dried, exposed to phosphorscreen and analysed using Typhoon (GE Healthcare). Schemes of the XerC cleaved intermediate and the resolved *attP(+)* substrates are depicted on the left. In the presence of EndoIII, the cleaved intermediate failed to accumulate, suggesting that EndoIII inhibit the reaction at a early step of the reaction. (B) Pseudo-HJ resolution assays were performed using a suicide pseudo-HJ. The conditions of the assay are similar to those of the figure A, except that the pseudo-HJ *attP(+)/dif1* was replaced by the suicide substrate depicted in figure 6A.



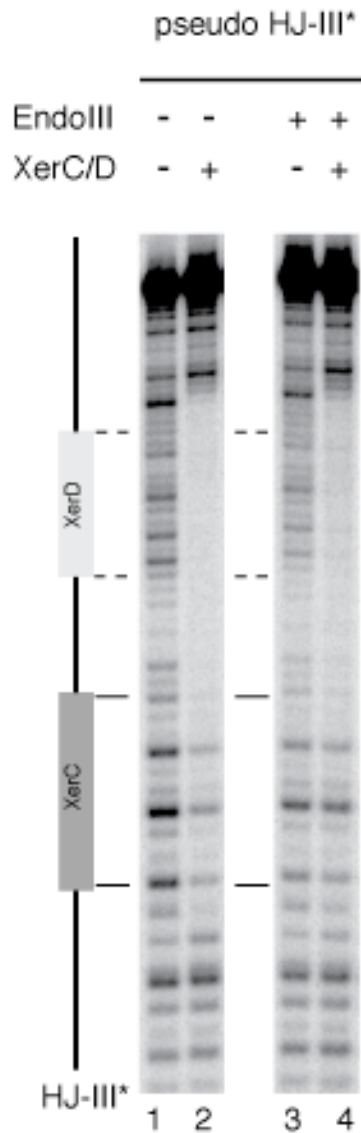

**Figure S7. EndoIII displaces XerC from the pseudo-HJ.**

DNaseI footprint experiment was performed using the pseudo-HJ labelled at the 5' extremity of the HJ-III strand (cleaved by XerC). Experiment was performed in conditions similar to those of the figure 6C (see Material and methods), in the presence of XerC/D (lane 2 and 4) and/or EndoIII (lanes 3 and 4). XerC and in a more limited way XerD footprint is lost after addition of EndoIII (compare lanes 2 to 1 and 4 to 3), supporting the hypothesis that the binding of EndoIII to the pseudo-HJ displaces XerC from it.

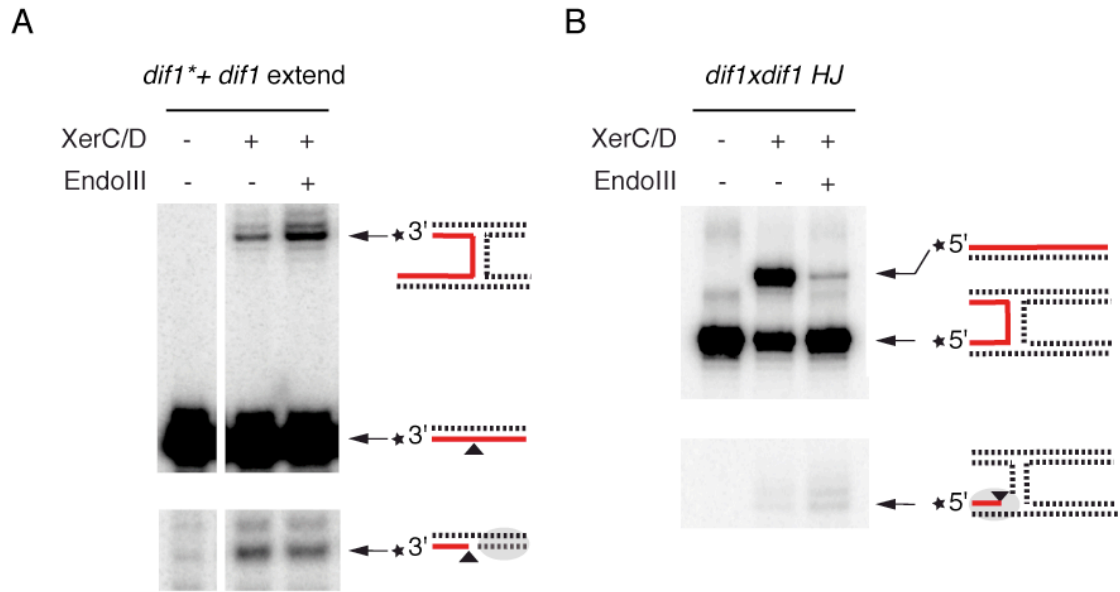

**Figure S8.** (A) EndoIII stimulates the formation of the *dif/dif* HJ. The conditions of the assay were similar to those of the Figure 4D. A labeled substrate was reacted with the *dif* extended substrate. (B) EndoIII inhibits the resolution of a the *dif/dif* HJ by XerC-mediated strand exchanges. The conditions of the assay were similar to those of Figure 4E except that the *attP/dif* pseudo-HJ was replaced by a *dif/dif* HJ.

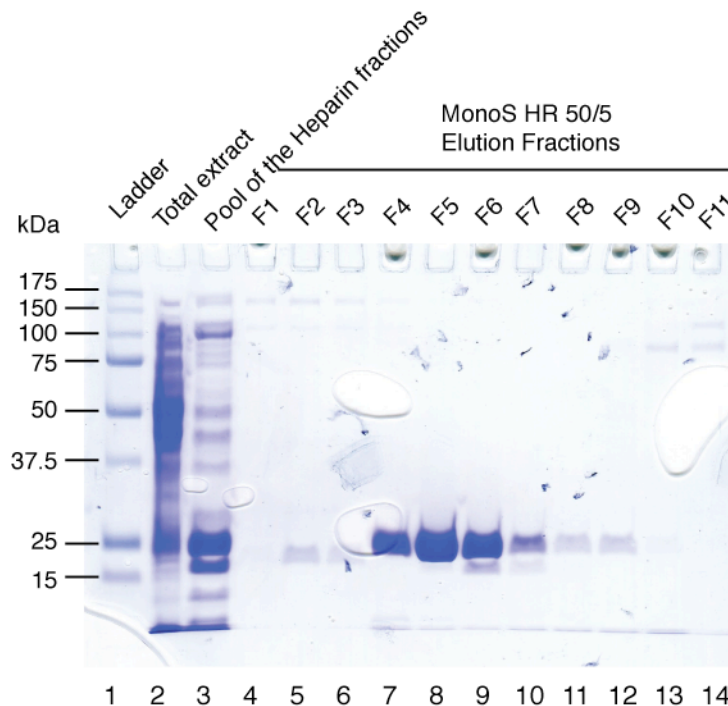

**Figure S9.** SDS-PAGE analysis of the protein samples during the course of *V.cholerae* EndoIII purification. Lane 1: Protein Ladder, 2: Protein extract of *V.cholerae* EndoIII producing cells 3: EndoIII containing fractions after heparin column purification, 4-14: Elution fractions of the MonoS column. EndoIII elutes in the fraction F5 and was estimated to be over 95% pure according to coomassie blue staining. Samples were analysed on 12% acrylamide Tris-Glycine gel.
